# Supplementary material for: Integrating Machine Learning and SHAP for Interpretable Prediction of 28-D ay Mortality in ICU Patients: A Comprehensive Analysis of Initial Physiologic al Features
Source: Research Square preprint supplement (doi:10.21203/rs.3.rs-8067228/v1), 2025-11-17
Supplement: Supplementary file 1 [file 3d85de27b1beeff83a9f7be1.xlsx]

## Sheet: Sheet1
age	gender	weight	height	ICU survival time	Did you die within 28 days	length of hospital stay	Starting with no revenue generation and pressure reduction	Initial non-invasive diastolic blood pressure	Initial heart rate	Initial respiratory rate	Initial blood oxygen	Initial body temperature	Sofa rating	P-S Index	GCS rating	apacheii	NMR	New indicators	PT	APTT	D-Dimer	complication	Infectious bacteria	underlying disease	site of infection	CRP	PCT	Mechanical ventilation and time	Platelet group
60	男	61	165	2	1	1	141	129	134	21	92	35	12	408	12	27	0	5682	12	31	0.7	1	1	1	1	105	0	23	1
74	女	51	159	12	1	12	101	84	88	24	86	36	4	348	14	19	2	2394	16	50	4.2	2	2	0	2	322	0	85	1
79	男	96	185	28	0	3	106	53	66	0	95	37	8	296	15	23	1	196	14	39	21.9	3	2	2	1	94	0	456	1
64	男	53	163	28	0	3	114	85	96	32	100	36	4	320	15	26	2	1002	16	49	15.3	0	3	0	3	202	3	240	1
45	男	72	158	28	0	5	133	73	89	23	100	36	7	350	10	22	1	430	16	46	22.3	2	3	0	4	298	3	6	1
64	男	67	152	3	1	3	144	81	98	19	97	36	7	350	6	28	0	1521	17	53	1.8	4	2	2	2	334	8	222	1
35	男	87	158	0	1	0	175	155	162	24	100	36	12	144	3	40	2	7184	12	32	16.2	2	4	0	5	189	12	23	1
59	男	69	157	28	0	5	129	72	90	30	99	36	10	120	8	25	2	25729	14	28	4.5	6	2	3	1	153	50	无	1
59	男	52	157	28	0	1	143	103	113	33	96	36	4	312	10	17	1	558	14	35	31.9	1	2	1	3	63	44	无	1
49	男	63	158	13	1	9	117	59	73	22	96	36	5	415	15	16	4	307	14	29	6.2	2	5	0	3	95	1	无	1
54	女	73	147	28	0	2	110	93	97	28	100	35	8	648	8	29	0	446	13	29	4	5	1	0	3	24	22	18	1
48	女	77	158	28	0	2	142	88	99	17	98	36	9	360	15	16	1	1686	37	180	2.8	4	2	0	3	166	4	105	1
49	男	51	155	16	1	16	142	67	83	25	87	37	9	27	15	16	0	25785	22	48	6.2	3	4	4	3	88	16	327	1
23	男	90	180	28	0	8	173	87	107	32	89	36	4	236	15	21	0	367	11	28	15.9	1	5	0	2	167	8	无	1
78	男	79	158	28	0	9	100	53	68	15	98	38	7	217	7	20	13	489	13	32	4.2	4	4	4	3	58	16	327	1
67	男	51	152	4	1	4	95	42	59	20	100	37	7	490	15	23	1	41	18	41	31.2	5	5	4	1	167	1	无	1
74	女	50	140	28	0	2	137	63	79	21	93	36	6	384	15	27	1	677	12	26	11.3	4	6	4	3	98	4	41h	1
43	男	58	158	28	0	3	147	100	114	19	83	36	11	539	7	39	1	1722	13	35	4.2	8	6	0	3	56	2	843	1
54	男	45	158	0	1	0	92	57	69	29	92	36	2	76	15	18	7	9449	23	43	16.7	4	2	0	1	273	30	456	1
49	男	57	158	28	0	2	119	99	104	20	94	37	7	378	14	24	1	2201	14	31	7.3	3	2	3	6	91	35	238	1
34	女	58	158	2	1	2	132	56	79	14	97	36	6	210	14	22	2	4782	13	37	14.7	4	2	0	1	60	29	23	1
61	男	71	158	28	0	2	97	50	61	26	100	37	9	324	15	21	1	1716	15	31	4.7	5	5	1	3	107	0	1072	1
47	男	82	158	28	0	6	119	62	79	16	100	36	7	301	10	25	0	813	13	35	3.2	4	3	5	3	247	27	62	1
69	男	58	158	28	0	6	152	106	117	15	96	37	11	429	9	24	0	1365	23	43	16.7	0	3	0	3	64	36	240	1
76	男	45	158	6	1	6	85	47	59	27	88	37	3	138	15	23	0	0	14	31	3.3	4	4	3	3	146	7	648	1
58	女	50	158	8	1	1	114	18	31	23	87	36	5	245	5	28	7	1515	13	37	4.5	3	2	1	1	75	10	124	1
28	女	76	158	28	0	2	124	50	66	16	96	36	5	225	13	14	0	1067	15	31	4.7	4	6	1	3	46	4	227	1
62	男	79	158	28	0	3	142	60	80	17	100	36	11	528	7	26	2	794	14	32	9.5	5	1	0	3	196	5	无	1
18	男	55	152	16	1	14	99	71	78	22	96	37	7	609	15	20	0	2018	14	36	7.3	1	2	0	1	275	6	24	1
90	女	50	158	28	0	2	99	80	85	21	86	36	10	480	6	35	4	687	12	32	6.1	8	2	0	3	183	24	105	1
46	男	61	158	28	0	0	99	62	71	18	95	37	3	120	15	27	2	2390	13	37	3.9	1	5	1	1	36	3	229	1
79	男	48	158	0	1	1	94	55	65	20	94	36	11	957	7	28	2	10150	12	27	26.4	4	6	0	3	486	17	无	1
43	男	73	158	22	1	23	139	76	88	19	100	36	12	168	15	31	2	5012	12	28	4.4	8	2	0	1	308	15	无	1
72	女	53	158	28	0	2	92	50	64	28	100	37	5	235	14	16	8	782	16	37	23	5	1	3	3	56	1	无	1
55	女	64	158	2	1	0	110	55	67	0	98	36	9	441	14	29	7	1647	15	28	5.3	6	1	0	3	102	27	无	1
63	男	72	158	2	1	2	136	91	102	23	100	36	2	174	15	16	1	630	14	32	2.9	1	2	3	7	110	0	无	1
63	男	77	158	4	1	1	110	69	83	34	65	36	8	696	12	25	4	1417	15	41	5.8	5	2	0	1	64	0	无	1
69	男	81	178	17	1	1	130	69	90	22	93	36	2	98	15	9	3	1003	12	29	6.2	3	2	0	1	128	1	32	1
80	男	87	178	28	0	3	164	62	92	29	92	36	3	531	14	21	0	472	14	31	9	1	2	3	8	129	2	241	0
58	女	72	158	28	0	43	113	81	92	22	100	36	4	1840	15	18	1	183	13	51	14.5	4	2	3	5	36	1	6	0
56	女	41	158	28	0	20	121	86	99	19	100	37	4	824	15	22	1	434	16	39	41.1	2	2	0	1	84	3	无	0
66	男	77	163	1	1	1	113	88	83	22	87	37	16	2512	3	47	33	83	35	9	26	7	4	0	4	142	0	43	0
54	男	43	168	28	0	7	150	76	96	18	93	37	6	1338	15	14	0	336	19	35	9	8	5	1	1	148	2	无	0
73	男	77	160	28	0	3	142	123	127	19	97	37	7	1071	15	25	6	200	13	51	14.5	8	4	0	3	142	15	无	0
55	男	72	157	28	0	6	132	41	63	26	100	37	7	1610	13	20	2	271	19	29	4.5	3	2	0	7	71	24	125	0
59	男	80	158	28	0	2	98	68	77	20	94	37	4	944	8	20	0	135	15	36	10.2	0	2	0	1	141	16	无	0
76	男	52	158	3	1	4	131	105	114	25	92	37	8	1176	15	18	2	513	7	35	7.9	4	2	0	1	122	19	26	0
37	女	71	158	2	1	2	116	81	89	23	92	36	4	660	10	28	2	615	15	17	2.9	7	2	3	1	6	14	无	0
58	女	91	183	5	1	4	129	82	79	24	97	36	5	565	14	12	1	328	25	31	5	5	2	1	1	106	23	234	0
61	男	43	158	28	0	2	119	96	101	17	95	36	1	225	15	17	0	212	20	38	9	5	4	0	7	259	16	无	0
54	男	54	158	23	1	4	140	53	78	22	100	38	9	2718	15	19	0	189	13	12	8.3	7	5	4	1	194	45	35	0
72	男	77	158	28	0	2	78	54	63	16	100	36	12	1212	6	31	0	329	16	37	11.2	6	3	4	3	130	2	无	0
60	男	45	158	28	0	6	94	73	78	24	99	36	3	855	13	18	1	51	6	42	5.2	7	6	1	3	178	17	无	0
63	男	59	158	28	0	2	133	70	88	19	100	36	5	615	13	23	0	170	16	54	7	1	7	1	1	6	17	无	0
49	女	67	158	28	0	1	165	77	99	27	100	37	9	999	8	26	0	633	16	28	13.7	8	8	0	1	117	0	无	0
34	女	63	158	3	1	3	121	76	87	14	100	36	9	747	11	31	0	3974	8	55	5.8	3	5	1	1	194	1	125	1
61	男	55	158	21	1	22	134	91	101	18	100	36	12	6888	15	21	2	846	16	38	10.4	7	8	0	8	54	0	无	0
47	男	83	165	28	0	1	147	93	110	14	100	36	4	984	9	24	1	182	26	44	8.5	8	3	2	5	81	0	138	0
49	女	86	158	28	0	2	93	50	60	23	89	37	7	1932	12	20	1	180	9	28	6.8	2	8	1	3	162	5	256	0
49	男	54	152	28	0	12	108	44	63	18	96	37	6	750	15	20	2	1068	13	49	4.8	8	2	1	3	76	8	无	0
52	男	57	122	21	1	4	119	68	78	15	99	38	12	2352	15	18	3	401	23	32	9.6	2	1	1	3	12	4	143	0
94	女	64	135	28	0	1	140	106	112	25	97	36	2	380	14	18	1	500	23	40	4.6	7	8	0	1	58	5	无	0
64	男	50	158	28	0	0	105	68	80	22	96	36	11	3476	15	25	6	802	16	27	12.8	1	3	1	8	117	2	241	0
43	男	48	137	28	0	7	99	39	50	25	99	39	15	2505	8	40	0	87	18	48	1.9	2	1	1	1	159	12	56	0
57	女	49	158	0	1	0	83	60	68	25	97	36	9	1323	14	20	2	944	17	26	7.7	8	4	1	3	187	17	无	0
87	男	51	158	28	0	2	91	62	69	17	99	37	3	597	13	20	9	313	20	47	15.1	8	5	5	1	168	0	无	0
52	女	70	158	28	0	3	124	59	77	11	91	35	8	424	3	32	0	710	14	23	13.7	7	6	0	3	111	3	无	1
52	女	39	158	6	1	6	121	58	78	29	100	37	14	2310	8	28	1	582	15	39	15.3	2	6	0	3	189	41	87	0
57	男	65	157	28	0	2	95	75	79	20	97	36	3	339	15	23	0	0	13	25	5.2	7	5	4	3	192	3	456	0
65	男	63	158	28	0	0	118	86	94	16	95	36	3	693	14	20	15	157	11	29	11.9	1	6	0	3	173	2	75	0
52	男	50	152	28	0	2	139	57	73	21	96	36	6	780	9	19	1	182	20	33	6.5	5	3	4	3	108	14	无	0
52	男	51	152	28	0	0	98	28	46	14	100	36	5	1130	15	24	3	921	10	30	21.3	5	3	0	2	168	18	45	0
43	男	61	158	28	0	10	97	62	74	29	92	36	8	1720	15	38	31	0	13	31	9.3	3	6	0	4	42	12	452	0
68	女	73	158	28	0	4	135	71	88	13	95	37	9	1980	7	19	0	100	5	56	6.2	2	6	1	1	108	2	57	0
72	男	70	158	28	0	0	153	65	92	22	95	36	9	1881	7	24	15	153	21	23	2.8	2	5	3	7	3	2	无	0
58	男	74	168	28	0	9	125	85	98	22	94	36	5	785	14	21	2	994	16	32	13	2	7	1	8	182	3	无	0
93	男	84	170	13	1	6	126	61	80	22	98	36	6	372	14	30	0	967	19	39	9.8	2	2	1	1	8	35	56	1
42	男	69	158	1	1	1	120	81	93	26	98	37	14	3556	9	21	0	123	15	11	25	2	7	0	7	96	16	98	0
36	女	46	142	3	1	3	95	57	67	21	98	36	8	1120	15	20	1	2718	13	43	3.6	4	8	4	1	164	1	76	0
47	男	60	158	28	0	4	130	90	103	29	93	37	6	1152	15	27	1	1457	11	47	8.6	3	2	0	1	56	0	无	0
36	男	72	158	28	0	9	157	79	100	11	93	37	3	753	14	15	1	291	17	14	10.1	7	1	0	3	123	0	279	0
75	男	46	158	14	1	4	108	68	78	17	100	36	9	378	13	22	0	1421	8	42	5	2	4	3	3	46	15	327	1
57	女	92	180	28	0	1	93	56	66	36	92	36	2	1022	15	16	2	68	30	35	21.9	8	5	3	1	90	18	无	0
42	男	115	158	28	0	9	110	50	65	15	100	36	5	1290	15	24	6	44	17	37	14.4	4	2	0	3	166	50	无	0
42	女	59	158	23	1	5	176	85	110	22	100	37	4	808	7	31	0	238	20	40	6.5	6	1	0	1	52	0	无	0
42	男	50	158	28	0	2	178	80	99	19	96	37	5	600	10	13	0	202	12	43	11.2	2	3	0	3	150	9	无	0
36	女	75	157	7	1	2	102	71	81	27	86	36	8	1376	15	22	0	327	17	37	12.8	4	2	0	3	66	5	无	0
65	男	73	158	28	0	3	120	58	72	31	94	37	7	1533	13	24	0	241	14	40	6.5	3	4	0	1	40	37	600h	0
48	男	82	158	8	1	3	122	67	85	11	100	36	6	936	15	17	8	878	13	83	1.3	7	3	0	3	18	4	无	0
68	男	70	158	28	0	4	155	62	81	17	98	36	2	408	14	13	1	276	13	35	2.7	4	2	0	3	100	6	无	0
55	男	63	165	28	0	11	99	46	59	19	100	36	4	816	14	25	2	3052	15	44	8.4	0	4	4	3	150	3	无	0
67	男	41	158	28	0	8	103	62	75	14	100	36	3	402	15	24	1	11160	17	63	6.5	4	2	3	1	22	5	无	0
45	男	46	158	28	0	3	135	95	103	19	100	36	3	681	15	18	3	158	9	31	10.7	8	5	3	1	6	17	无	0
69	女	67	158	28	0	4	142	115	125	15	96	36	5	1050	15	27	1	570	13	32	3.3	8	4	1	3	158	0	无	0
55	男	97	158	28	0	1	102	82	87	26	92	37	3	2664	12	21	1	106	16	26	3.2	7	3	0	3	58	3	无	0
74	女	70	157	28	0	1	111	81	90	19	94	36	3	507	14	18	2	30	16	22	2.3	2	4	3	3	53	0	31	0
68	男	55	158	1	1	1	101	37	54	22	99	36	12	516	14	24	7	1391	13	24	11.2	4	8	1	3	23	0	32	1
47	男	50	158	4	1	3	124	69	82	22	94	37	7	1204	12	30	0	287	19	47	2.5	2	5	0	8	15	4	280	0
65	女	66	158	28	0	4	127	88	100	22	96	36	6	798	15	11	0	1119	16	29	3.2	7	6	3	5	202	0	105	0
48	男	46	158	28	0	1	114	82	86	20	92	36	5	630	15	13	0	738	14	36	27.6	8	2	3	1	295	0	27	0
65	男	38	158	28	0	1	129	67	80	22	98	37	4	836	14	19	0	182	12	38	12	2	4	1	9	95	2	398	0
72	男	73	158	28	0	7	157	75	101	20	100	37	5	745	7	20	0	186	12	42	10.2	8	3	0	6	169	1	108	0
47	女	63	158	28	0	2	145	62	81	13	97	37	4	448	14	12	1	260	14	26	14	1	4	3	1	117	0	无	0
52	女	63	165	28	0	3	98	69	75	22	99	36	9	1017	15	16	0	207	13	28	8.2	4	3	1	7	194	1	无	0
34	女	70	158	28	0	3	86	35	47	25	100	35	9	1161	14	25	0	240	12	24	5.7	0	4	0	1	54	0	12	0
68	女	83	158	9	1	9	133	59	82	24	100	37	8	1224	15	20	4	642	15	26	5.5	2	2	4	9	81	0	241	0
49	男	61	165	0	1	0	100	50	33	27	100	36	11	3047	8	28	3	430	23	34	28	7	5	3	6	203	1	6	0
67	男	55	158	3	1	3	96	56	67	20	85	36	11	8393	15	34	9	303	12	28	1.5	1	2	4	3	45	0	无	0
69	女	70	158	28	0	13	130	94	102	24	96	37	11	3234	15	14	1	243	14	29	2.2	5	8	3	7	224	3	20	0
23	男	60	152	28	0	4	145	66	81	19	100	36	2	318	15	12	0	324	11	28	0.9	4	4	1	1	70	6	43	0
51	女	97	165	28	0	0	117	54	67	26	96	36	5	1760	13	28	2	208	13	31	2.5	5	3	0	3	162	5	24	0
50	男	45	152	28	0	4	125	68	83	19	100	36	2	738	14	14	0	25	10	32	4.3	4	3	0	1	152	5	1095	0
40	男	50	152	28	0	12	124	82	89	21	98	37	11	913	15	26	0	3570	12	29	4.2	3	5	0	3	89	1	无	1
78	男	53	135	19	1	6	60	43	49	23	92	36	10	2350	15	21	0	193	12	28	10.9	2	5	3	3	181	1	421	0
76	男	51	158	28	0	1	62	37	47	16	99	36	15	1155	3	48	4	641	13	30	1.5	8	3	0	3	165	8	无	1
48	男	79	158	21	1	3	103	57	70	19	97	36	5	520	13	16	5	953	12	26	2.6	4	4	0	1	256	6	296	0
64	男	54	158	1	1	1	91	45	60	17	92	37	6	2628	13	29	14	69	15	30	1	3	2	0	3	126	6	35	0
80	女	53	147	28	0	2	169	68	91	27	100	36	4	400	14	25	0	170	14	44	6.9	4	8	4	3	76	8	无	0
58	男	95	158	28	0	3	66	35	43	16	94	36	8	872	15	20	2	2192	11	37	4.4	0	5	3	3	181	3	无	0
56	男	42	158	28	0	11	137	59	77	18	100	37	4	2040	15	20	9	88	14	43	8	8	7	1	10	134	2	无	0
49	男	84	158	13	1	7	144	62	82	19	100	37	10	1260	5	25	1	139	11	28	0.8	2	6	1	7	133	53	12	0
66	女	50	158	28	0	13	103	53	67	28	98	37	7	560	14	21	1	182	13	45	8.09	5	7	0	1	86	8	无	1
75	男	56	158	5	1	2	105	60	71	21	92	36	1	567	15	16	2	126	12	15	13.61	8	7	3	3	88	32	无	0
60	男	48	158	28	0	1	134	84	98	18	100	36	5	905	12	14	3	661	13	32	4.13	0	7	3	1	12	4	125	0
54	男	60	158	28	0	3	107	18	39	26	100	36	7	749	8	35	1	111	11	38	4.5	4	2	1	1	200	50	无	0
69	男	68	150	3	1	3	107	85	92	25	90	36	4	716	15	14	1	153	17	39	8.91	1	5	0	1	22	0	无	0
71	男	60	158	28	0	5	110	52	71	18	91	37	8	2352	15	24	17	316	17	51	11.93	5	4	3	1	74	9	无	0
50	男	75	158	28	0	1	178	83	109	20	95	36	3	627	12	18	1	198	10	20	4.16	2	3	1	1	70	48	无	0
51	女	49	158	28	0	11	121	75	88	20	90	37	6	1452	15	15	4	283	14	41	11.24	1	8	1	3	19	2	无	0
73	女	68	158	1	1	1	104	45	58	14	99	36	10	1970	15	21	22	486	15	37	3.55	5	5	0	3	234	16	86	0
59	男	75	160	2	1	2	118	76	86	27	100	36	10	560	13	19	5	114	14	35	5.2	5	4	0	3	68	50	无	1
68	男	82	158	15	1	1	138	45	71	6	96	36	7	798	10	25	0	583	15	53	1.08	4	3	0	10	58	5	26	0
59	男	57	157	28	0	2	114	71	82	19	96	36	5	810	15	15	8	288	14	33	17.99	1	2	0	7	117	2	无	0
45	男	55	168	28	0	5	139	70	88	23	99	36	4	744	14	21	2	454	13	29	17.2	8	4	4	1	260	11	无	0
83	男	57	158	7	1	3	159	129	139	23	86	37	2	646	13	18	0	253	16	16	4.65	4	6	0	3	15	50	无	0
55	男	53	158	21	1	21	155	102	118	28	91	37	3	816	15	21	0	306	14	38	4.55	2	4	3	1	56	1	无	0
59	女	54	145	28	0	2	106	43	58	17	100	37	4	656	14	16	2	220	14	2	4.58	4	8	0	1	242	13	257	0
81	男	82	158	1	1	1	70	48	52	27	97	37	15	1920	13	34	0	266	14	39	2.89	0	2	4	1	97	3	276	0
56	女	64	158	28	0	4	103	88	94	26	96	36	4	1244	13	19	1	386	11	40	16.98	4	7	3	1	48	3	453	0
54	男	78	180	20	1	8	87	63	70	21	99	36	6	1836	14	35	21	103	7	41	2.44	3	6	0	1	159	12	无	0
70	男	54	158	28	0	13	139	123	126	18	98	36	4	340	13	19	1	835	16	25	4.17	7	7	3	1	52	3	234	1
43	男	65	152	28	0	1	112	49	65	19	99	37	5	705	13	21	10	809	16	32	6.02	2	8	2	1	187	17	无	0
59	女	64	160	28	0	3	97	60	68	14	100	36	12	1968	9	23	12	0	15	20	19.06	1	3	1	1	67	9	无	0
76	男	82	158	28	0	0	133	55	78	20	97	36	3	393	14	14	2	90	11	19	0.71	0	5	4	3	135	4	无	0
37	男	68	173	28	0	0	118	52	72	29	98	38	6	1086	8	27	1	367	12	13	0.53	2	7	3	3	168	0	无	0
55	男	55	158	28	0	3	118	55	66	20	96	37	10	1820	15	15	1	204	20	25	16。3	1	5	1	3	111	3	35	0
47	男	79	158	28	0	3	130	67	81	24	95	36	7	574	13	17	0	3988	12	28	2.3	0	2	0	3	189	41	无	1
54	男	76	158	28	0	5	140	77	91	25	97	37	7	917	13	11	0	427	12	36	4.2	0	4	0	8	46	7	无	0
41	男	50	165	28	0	1	116	64	78	14	100	36	4	1188	13	20	4	140	16	43	1	4	2	0	7	246	9	无	0
77	女	55	152	28	0	4	113	73	86	14	97	37	12	1908	9	32	1	265	16	47	9.47	4	3	0	1	122	3	65	0
81	女	60	152	28	0	1	94	48	59	19	100	36	5	1050	12	25	1	1253	11	29	8.41	6	1	3	10	192	3	78	0
39	男	62	158	10	1	2	116	78	86	16	99	36	8	512	15	25	1	1593	18	20	3.71	0	5	3	7	173	2	68	1
58	男	46	150	28	0	4	119	65	80	20	95	36	8	1224	15	18	0	583	15	43	10.4	5	4	4	1	106	4	54	0
58	男	64	158	21	0	4	121	70	83	20	96	36	6	969	12	21	3	1392	12	46	16.2	3	3	1	3	125	11	无	0
47	男	62	158	27	0	1	146	64	79	12	97	37	4	378	14	12	1	456	15	25	5.3	1	3	3	1	136	2	56	0
44	男	46	158	29	0	3	138	96	101	18	100	36	2	572	15	17	3	271	9	31	16.7	7	4	2	1	6	18	无	0
78	男	81	158	28	0	9	105	53	69	15	97	38	7	213	7	19	13	98	12	35	1.5	3	3	3	2	50	17	76	0
51	女	59	164	0	1	1	99	50	34	27	100	36	10	2905	8	27	3	660	23	36	0.8	6	4	2	5	197	2	无	0
51	男	51	150	28	0	0	99	26	46	13	99	36	5	1220	14	23	3	878	10	31	4.5	5	2	0	1	150	16	无	0
33	男	57	158	2	1	1	133	55	80	13	96	36	5	215	14	21	3	4861	13	38	6.5	4	1	0	1	73	27	456	0
49	男	63	158	29	0	1	145	65	79	12	97	37	3	488	13	12	1	100	14	24	3.2	0	4	2	1	129	0	57	0
67	男	52	158	28	0	13	102	51	67	27	98	37	7	515	13	20	1	241	13	45	5.2	5	7	0	0	77	8	1095	0
71	男	70	158	27	0	0	154	68	91	22	94	36	9	1845	6	24	16	2	21	25	10.9	2	4	2	7	1	2	1095	0
65	男	73	158	28	0	3	114	57	73	31	94	37	7	1560	13	23	0	41	15	37	0.7	3	3	0	1	41	38	无	0
63	男	52	158	0	0	1	92	47	59	16	91	37	5	2516	12	29	15	340	14	31	3.3	3	1	0	2	118	3	20	0
47	男	47	158	26	0	1	114	79	85	19	92	35	5	595	15	12	0	170	14	41	21.3	7	1	2	0	281	0	无	0
52	男	64	164	26	0	3	97	70	75	22	98	36	8	934	14	16	0	416	13	30	7.7	3	2	0	7	192	0	无	0
36	女	65	158	10	0	2	120	76	87	15	99	36	8	426	15	25	1	1846	19	23	7.7	0	4	3	7	171	0	456	1
56	男	74	161	4	1	2	116	73	84	26	99	36	10	357	13	19	5	210	14	35	1.8	4	3	0	3	65	52	23	1
76	男	55	152	30	0	4	112	73	85	14	96	37	11	2036	9	32	2	38	16	49	10.2	4	2	0	1	123	1	125	0
58	男	46	158	28	0	5	98	74	76	24	98	36	2	789	12	17	0	31	6	41	6.2	6	5	0	3	190	16	23	0
74	女	54	161	13	0	13	99	82	83	24	86	36	4	459	14	19	2	2499	16	51	27.6	2	1	0	2	319	2	421	1
63	男	73	158	26	0	3	118	55	72	30	93	37	7	1635	13	23	0	184	13	41	12	2	3	0	0	41	38	无	0
67	男	81	179	17	1	2	129	68	91	22	93	36	1	25	14	9	3	1163	12	29	0.7	3	1	0	0	133	0	无	0
75	女	69	158	0	1	1	105	44	58	14	98	36	9	1865	15	20	22	1138	15	39	13	4	4	0	2	238	17	108	0
33	女	58	158	2	1	2	132	57	75	13	96	36	6	455	13	21	2	4595	13	36	4.3	3	1	0	1	55	30	无	1
47	女	82	166	27	0	1	143	94	109	14	99	36	4	1152	8	23	1	451	26	44	2.3	8	3	2	5	81	4	35	0
59	男	71	158	27	0	2	95	49	56	26	99	37	8	320	14	21	1	2021	15	31	5.2	5	5	1	3	112	0	234	0
47	男	83	158	6	1	3	120	70	87	11	100	36	5	960	14	17	8	1500	13	81	4.2	6	2	0	3	9	4	327	0
58	男	90	184	6	1	4	128	82	77	24	96	36	4	504	13	12	2	473	25	32	4.3	5	1	1	0	116	22	56	0
47	女	86	158	26	0	2	93	49	62	23	89	37	7	1973	11	19	0	221	9	25	14	1	8	0	3	173	3	无	0
78	男	78	158	28	0	9	100	49	69	15	97	38	7	148	7	20	12	443	13	34	31.9	3	4	3	3	52	15	57	1
53	男	55	158	25	0	4	135	52	76	22	99	38	8	2522	14	18	0	223	13	12	10.9	6	5	4	0	196	47	无	0
66	男	53	158	2	1	4	98	55	64	19	85	36	11	8266	15	34	9	541	12	27	9.8	1	2	4	2	50	0	无	0
48	女	66	158	25	0	1	165	78	99	26	100	37	8	1001	7	25	0	134	15	26	2.44	7	8	0	1	112	1	无	0
45	男	48	135	27	0	7	102	39	48	25	98	39	15	2396	7	40	0	23	18	48	22.3	1	1	1	1	163	14	105	0
58	男	77	159	3	1	3	119	73	86	26	99	36	10	553	13	19	4	256	13	36	9	4	4	0	2	70	46	26	0
52	男	53	158	25	0	5	142	53	77	21	99	38	8	2614	14	18	0	236	14	13	6.1	7	5	3	0	182	47	296	0
84	男	56	158	6	1	4	160	130	135	23	85	36	1	570	13	18	0	117	16	15	11.24	3	5	0	2	18	50	227	0
32	男	60	158	3	0	1	135	58	74	12	96	36	5	291	13	22	2	4848	13	36	5.2	3	1	0	0	52	30	105	0
43	男	59	158	27	0	9	98	63	74	29	92	36	7	1743	15	37	31	8	13	32	10.4	3	6	0	3	49	11	1095	0
40	男	55	158	27	0	3	146	101	112	19	82	36	10	538	6	39	1	1358	13	34	8.5	8	6	0	3	50	1	23	1
66	男	82	158	17	1	2	143	45	69	5	96	36	7	882	9	24	0	815	15	53	4.2	3	3	0	10	56	6	6	0
48	男	81	158	7	0	4	124	67	86	11	99	36	5	982	15	17	8	860	13	83	16。3	6	3	0	3	29	8	125	0
50	男	53	151	28	0	12	109	46	65	18	95	37	5	888	14	18	2	702	13	49	5.8	8	1	0	2	80	10	无	0
23	男	91	181	28	0	8	170	84	106	32	89	36	3	191	14	22	0	1195	11	29	19.06	0	4	0	1	158	9	138	1
58	男	52	157	29	0	0	139	102	112	33	96	36	4	270	9	17	1	734	14	33	22.3	0	2	0	2	54	44	无	1
67	男	69	158	28	0	3	155	60	81	16	97	36	2	283	14	12	1	220	13	32	10.2	3	1	0	3	95	5	6	0
57	男	43	158	28	0	6	94	73	75	24	98	36	2	813	13	16	0	574	5	41	15.3	6	6	1	3	182	15	24	0
71	男	69	158	0	1	1	102	47	58	13	98	36	9	2062	15	21	22	1167	15	40	4.8	4	5	0	3	236	15	27	0
41	男	115	158	28	0	9	110	48	66	15	99	36	4	1414	15	23	6	9	17	41	9.3	3	1	0	2	159	47	31	0
68	女	40	158	27	0	8	106	57	76	13	99	36	3	494	15	24	0	11288	17	67	8.6	3	1	2	0	13	4	456	0
51	男	99	165	28	0	0	118	53	63	26	96	36	5	1587	12	28	2	156	14	30	21.9	4	2	0	2	164	4	43	0
56	女	67	156	27	0	4	126	73	88	30	98	36	9	223	8	24	2	25674	13	25	3.3	6	2	2	1	151	49	无	1
55	男	64	158	2	1	0	109	56	65	0	97	36	8	264	14	29	7	1573	15	23	16.7	5	1	0	2	119	27	23	1
35	男	71	158	27	0	7	155	79	100	10	93	37	2	839	13	15	2	359	16	13	1.08	6	0	0	3	123	0	27	0
60	女	42	158	29	0	2	118	95	101	16	95	36	0	189	15	17	0	335	20	37	4.5	5	3	0	7	273	16	1095	0
52	男	64	165	27	0	2	97	66	77	22	98	36	9	1084	14	16	0	414	14	30	2.5	4	3	0	6	184	0	280	0
69	男	81	158	13	0	2	136	46	70	6	95	36	6	670	9	24	0	671	15	54	6.5	3	3	0	9	45	2	无	0
75	男	52	161	13	0	13	98	82	87	24	86	36	4	460	14	19	2	1947	17	50	15.3	1	2	0	1	313	0	57	1
43	男	53	168	27	0	5	138	74	90	23	99	36	3	603	13	20	1	107	13	27	31.9	7	3	4	0	269	10	86	0
62	女	61	158	27	0	3	131	71	88	19	99	36	4	550	13	22	0	31	16	52	4.2	1	7	1	0	20	18	无	0
68	女	83	158	9	1	9	126	57	84	24	100	37	7	1128	14	20	3	538	15	26	11.24	1	2	4	8	74	2	456	0
65	女	54	160	29	0	4	118	83	96	31	100	36	3	151	14	27	2	1390	16	50	3.71	0	3	0	2	198	5	85	1
62	男	59	158	25	0	2	135	69	85	18	99	36	4	624	12	22	0	258	17	55	3.3	0	7	0	1	2	18	6	0
54	女	56	158	31	0	3	117	54	63	20	95	37	10	1993	15	16	1	72	20	23	0.53	0	5	0	3	96	2	54	0
71	女	78	161	29	0	3	142	125	124	18	96	37	6	1326	14	25	5	552	14	53	9.6	8	4	0	2	147	15	无	0
21	男	91	180	28	0	8	170	87	108	32	88	36	4	245	14	20	1	256	11	28	1.9	0	5	0	2	168	7	12	1
56	男	97	158	27	0	0	105	80	89	25	91	37	2	2771	11	20	1	276	16	24	3.3	7	2	0	2	58	1	229	0
38	女	73	158	2	1	2	120	84	92	22	92	36	3	682	9	29	1	564	15	16	4.5	6	2	3	1	5	16	327	0
77	男	80	158	28	0	9	100	53	69	14	98	38	6	264	6	19	13	584	12	33	9	3	4	4	3	71	16	98	1
59	女	73	158	28	0	42	115	82	94	22	99	36	4	1807	14	18	0	99	13	51	4.13	3	1	2	5	32	0	6	0
75	男	45	158	15	1	5	108	66	76	16	99	36	8	396	13	21	0	1667	8	44	7	1	3	3	3	50	14	无	1
50	女	99	165	28	0	0	113	54	64	25	95	36	5	1811	12	27	1	362	13	32	11.24	4	3	0	2	150	3	无	0
60	男	44	158	27	0	6	93	73	79	23	99	36	2	799	12	18	1	82	6	41	4.4	6	5	0	3	177	17	无	0
71	男	61	158	27	0	6	152	102	117	15	96	37	10	421	8	23	1	1474	22	43	5.2	0	3	0	2	66	38	18	1
58	男	64	158	21	0	4	121	70	83	20	96	36	6	969	12	21	3	1392	12	46	0.9	3	3	1	3	125	11	20	0
62	女	45	158	29	0	1	133	86	98	18	100	36	4	984	12	14	2	1212	13	31	6.9	0	7	2	1	13	1	无	0
52	男	41	158	28	0	19	120	85	99	19	100	37	4	721	15	23	1	289	16	37	8.3	1	1	0	1	87	3	无	0
79	男	78	158	25	0	9	99	50	70	14	98	38	6	212	6	20	13	1036	13	33	21.9	4	4	4	3	48	16	无	0
55	男	73	156	28	0	5	132	41	65	25	99	37	7	1793	12	19	2	27	18	31	4.4	3	1	0	7	73	24	234	0
56	女	48	158	0	0	1	80	60	68	23	96	36	8	1434	14	19	1	1435	17	27	1.5	8	3	0	2	188	16	257	0
48	男	81	158	8	1	3	120	67	86	10	99	36	5	1065	14	17	8	1180	12	86	13.7	7	3	0	3	20	5	43	0
49	女	47	152	27	0	2	135	57	73	20	96	36	6	782	9	19	0	155	20	32	5	5	2	3	2	108	14	35	0
58	男	51	156	29	0	1	145	103	112	33	95	36	4	342	9	16	1	672	14	38	4.5	1	1	0	2	52	44	6	0
65	男	69	158	28	0	2	115	60	73	31	93	37	6	1629	13	24	0	222	15	38	2.3	2	3	0	1	29	38	无	0
53	男	46	158	27	0	11	123	76	85	20	89	37	5	1601	15	15	6	514	14	39	6.5	1	7	0	3	2	2	24	0
54	男	55	158	21	1	21	158	99	119	26	91	37	3	628	14	19	0	223	14	35	5.2	2	4	2	0	62	0	125	0
62	女	51	158	27	0	1	104	70	77	21	96	36	11	3349	14	24	6	688	16	27	41.1	0	3	1	8	123	4	32	0
55	男	65	158	26	0	5	96	91	94	26	96	36	3	1369	13	18	1	892	10	39	2.9	3	7	2	1	55	4	280	0
37	男	70	158	27	0	9	156	85	98	11	93	37	2	726	13	14	2	254	16	15	19.06	6	1	0	2	125	1	41h	0
55	女	53	158	21	0	21	154	99	119	27	91	37	2	751	14	22	0	611	14	39	1.08	1	3	2	1	38	2	85	0
42	男	73	158	23	0	22	136	76	87	19	98	36	12	47	14	31	3	4929	12	25	0.9	7	1	0	0	299	16	20	0
75	男	55	158	5	1	2	103	55	68	21	92	36	1	513	14	15	2	742	12	15	7.7	8	6	3	2	90	33	68	0
45	女	74	158	28	0	5	136	74	89	22	100	36	6	215	10	22	1	180	16	45	4.2	2	2	0	3	299	1	241	1
57	男	42	158	28	0	20	122	84	97	19	100	37	3	1024	15	21	0	207	16	36	7.9	2	1	0	0	82	3	无	0
61	男	78	158	27	0	3	139	63	81	17	99	36	11	525	7	26	2	1358	13	30	7.7	4	1	0	2	199	5	无	1
82	女	57	158	7	0	5	155	127	139	24	85	36	2	640	13	18	0	88	16	15	10.7	3	6	0	2	15	52	41h	0
51	男	51	151	28	0	1	97	24	46	12	99	36	5	1186	14	24	4	1513	10	32	11.2	5	3	0	1	169	19	无	0
45	男	74	158	28	0	2	141	87	97	17	98	36	8	452	14	15	1	2015	37	180	2.9	4	1	0	2	161	3	无	0
43	男	72	158	24	0	23	140	72	86	18	99	36	12	258	14	32	2	4955	12	29	5.2	8	1	0	1	315	16	无	0
37	女	70	158	2	1	2	114	82	88	23	92	36	4	763	10	28	2	54	15	15	4.58	7	2	3	1	2	15	18	0
81	男	58	153	28	0	1	95	43	60	18	100	36	4	989	11	24	0	1246	10	31	13.61	5	1	2	10	181	3	327	0
93	男	64	137	29	0	1	144	106	115	24	96	36	2	351	13	19	1	537	23	42	5.8	7	7	0	0	51	3	无	0
61	女	80	158	4	0	1	111	64	81	34	64	36	8	769	11	25	4	1848	16	37	5.7	4	1	0	0	61	0	无	0
64	女	67	158	27	0	3	126	87	101	23	95	36	6	747	15	10	1	1706	16	27	0.53	7	5	2	4	209	0	18	0
51	男	63	166	27	0	3	97	72	71	22	97	36	8	1016	14	17	0	45	13	29	16.7	3	3	0	7	193	1	无	0
53	男	64	158	1	1	0	109	55	64	0	98	36	8	479	13	30	7	1943	16	29	6.1	5	0	0	2	101	26	无	0
64	男	40	158	27	0	0	131	65	78	21	98	36	4	911	14	18	2	465	12	37	26.4	1	3	0	8	85	1	32	0
59	女	76	159	2	1	2	116	75	83	26	100	36	9	389	13	18	5	510	14	34	6.2	4	3	0	2	75	51	6	0
62	男	61	164	1	0	1	141	129	131	20	92	35	12	476	12	26	1	5867	12	30	17.2	0	0	1	1	99	1	无	1
45	男	71	158	27	0	6	133	73	89	22	99	36	6	327	10	22	1	286	15	46	3.3	1	2	0	4	297	1	43	0
43	女	66	151	26	0	1	110	46	64	19	98	37	5	772	12	21	9	751	17	34	14	1	7	1	0	199	17	无	0
46	女	63	158	28	0	1	141	63	81	12	97	37	3	522	13	12	1	166	15	25	7.7	1	3	2	1	121	0	229	0
25	男	77	158	28	0	3	124	44	67	16	95	36	5	379	13	14	1	992	15	33	1.3	3	6	0	2	33	3	无	1
58	女	55	146	27	0	1	105	41	58	17	98	37	4	785	13	16	1	582	14	3	7.3	3	8	0	1	228	13	无	0
78	男	81	158	28	0	9	101	52	69	14	97	38	6	346	6	19	12	602	12	30	14.5	3	3	4	3	57	14	85	0
71	女	69	158	28	0	3	153	63	80	16	97	36	2	546	13	13	1	700	13	37	3.3	4	2	0	2	90	4	12	0
65	男	79	161	0	1	1	115	88	80	22	87	37	16	2539	3	46	33	209	34	10	5.5	6	3	0	3	147	3	无	0
60	男	48	158	27	0	2	131	81	99	18	100	36	5	908	12	14	3	181	12	34	3.2	0	7	2	0	12	5	无	0
63	女	53	158	27	0	0	109	66	78	22	96	36	10	3559	15	24	6	129	16	25	8.2	0	2	1	8	118	1	138	0
72	男	69	154	27	0	0	106	81	88	18	94	36	2	577	13	17	2	85	16	21	4.2	2	3	2	2	47	1	85	0
73	男	79	158	28	0	2	79	53	62	16	100	36	12	1182	5	30	0	250	16	39	2.9	5	3	3	3	144	3	无	0
75	女	71	156	27	0	1	112	79	88	18	93	36	2	545	14	18	2	330	15	22	12.8	2	4	2	3	75	1	32	0
69	女	81	158	15	1	1	136	44	70	4	96	36	7	794	10	24	0	44	15	51	4.6	3	3	0	10	55	5	无	0
79	男	59	152	26	0	0	94	49	59	20	100	36	5	968	11	24	2	982	11	30	7	5	0	3	9	195	4	456	0
60	男	63	158	28	0	3	99	58	68	14	99	36	11	2091	8	24	12	71	15	19	2.3	0	2	1	0	68	6	无	0
16	男	55	154	15	0	14	93	70	76	22	95	37	7	614	15	20	1	2264	14	39	4.5	0	1	0	1	273	5	无	0
63	男	73	158	2	1	2	137	95	101	22	99	36	1	370	15	14	1	700	14	35	8.09	0	1	3	7	103	0	无	0
52	男	50	155	17	1	16	136	64	84	24	86	37	8	129	14	15	0	26379	23	50	13.7	2	4	3	2	79	17	23	0
50	男	50	151	29	0	2	136	53	73	20	96	36	5	726	9	17	0	200	20	36	5.5	5	3	4	2	99	12	无	0
41	女	53	158	26	0	2	181	81	102	18	95	37	5	603	10	12	0	528	13	43	1.8	1	3	0	2	153	9	无	0
62	男	81	158	25	0	2	140	58	82	18	99	36	11	637	6	23	1	812	13	33	4.65	5	0	0	2	192	4	无	0
86	男	51	158	28	0	2	88	61	71	16	98	37	3	635	12	19	9	570	20	50	4.17	7	4	4	1	147	0	无	0
52	男	72	159	29	0	6	131	39	60	25	100	37	6	1639	13	19	2	109	18	30	5.7	3	1	0	6	74	25	648	0
94	女	64	136	29	0	1	144	105	113	24	97	36	1	271	13	18	1	896	24	39	8.5	6	7	0	0	57	6	无	0
43	男	56	167	28	0	4	134	73	87	23	98	36	4	632	13	19	2	563	13	26	3.71	7	3	4	0	270	10	12	0
62	男	77	158	27	0	3	139	61	78	17	99	36	10	558	6	26	1	543	14	31	4.3	4	0	0	3	199	4	无	1
60	男	78	158	28	0	2	145	61	80	16	100	36	11	397	7	25	1	790	14	33	5.8	4	0	0	2	184	5	无	1
69	男	53	158	2	0	3	100	53	68	20	84	36	11	8341	15	34	8	214	12	30	2.8	0	2	3	2	27	0	6	0
71	男	77	160	28	0	3	141	120	127	19	97	37	7	1119	15	25	6	381	12	52	5.2	7	3	0	3	136	15	86	0
41	女	115	158	28	0	8	107	44	63	15	100	36	5	1195	14	24	7	391	17	36	4.17	4	2	0	3	161	51	无	0
91	女	49	158	29	0	2	103	78	86	21	85	36	9	634	5	34	4	676	13	28	10.9	7	1	0	2	190	24	无	0
70	男	72	158	30	0	0	156	66	90	23	96	36	9	1998	6	25	16	299	21	22	4.5	2	4	3	7	3	3	35	0
50	男	73	158	28	0	1	179	84	109	21	94	36	2	476	11	17	1	210	10	20	10.4	2	2	0	0	79	46	86	0
68	女	38	158	27	0	8	101	61	74	13	99	36	3	312	14	23	2	11658	17	63	8	3	1	3	0	12	7	68	0
48	男	49	158	27	0	10	120	74	87	20	89	37	5	1232	14	14	5	569	13	42	14.4	1	7	1	3	27	1	23	0
49	男	86	158	11	1	7	143	60	83	19	100	37	9	1184	4	26	1	136	11	31	27.6	1	6	0	6	138	54	23	0
28	男	78	158	27	0	3	124	50	64	16	96	36	5	298	13	13	0	1147	15	31	0.71	3	6	0	3	29	6	43	1
50	男	84	158	12	0	7	147	63	85	18	100	37	9	1220	4	24	0	248	11	27	4.4	2	6	1	7	143	52	6	0
46	男	81	158	21	0	3	105	53	66	18	97	36	4	564	13	15	5	1102	13	26	27.6	3	3	0	1	256	8	240	0
77	女	96	184	28	0	3	103	53	64	0	94	37	7	149	15	23	1	477	14	39	21.9	2	1	2	0	97	0	279	1
47	女	62	158	27	0	2	148	63	81	13	96	37	4	524	14	12	1	148	15	24	3.55	1	3	3	0	110	0	124	0
59	女	56	145	29	0	1	106	42	59	17	99	37	3	602	14	16	2	327	14	2	6.5	3	8	0	0	252	13	327	0
94	男	64	133	28	0	1	141	107	111	23	97	36	1	381	14	17	1	972	24	41	9.47	7	7	0	0	48	9	无	0
54	男	51	158	23	0	4	143	58	77	21	100	38	8	2709	14	18	1	167	13	12	1.5	7	5	4	1	201	47	43	0
38	女	64	158	9	1	2	113	77	86	16	98	36	8	389	15	24	1	1522	18	21	2.9	0	4	3	6	180	3	无	1
49	女	88	158	28	0	3	92	50	59	22	89	37	7	1821	12	20	1	511	8	29	7.7	2	8	0	2	154	3	无	0
80	男	52	146	28	0	1	167	66	93	27	99	36	3	492	14	24	0	326	14	41	5.2	3	8	3	3	92	8	无	0
73	女	71	156	27	0	0	107	81	91	19	94	36	3	545	14	17	2	386	16	23	5.8	2	3	2	2	54	0	无	0
42	女	51	150	27	0	12	124	82	90	21	97	37	11	1013	14	25	0	3544	13	28	4.3	2	4	0	2	94	2	327	0
94	男	64	134	27	0	0	145	106	110	24	97	36	1	411	13	17	1	376	23	38	10.7	7	7	0	1	45	5	87	0
70	男	76	158	26	0	3	73	52	62	15	99	36	11	1225	6	30	1	315	16	35	16.7	6	2	3	3	147	0	无	0
48	男	76	158	27	0	1	141	88	98	16	97	36	8	194	15	16	1	1431	38	180	26	4	1	0	2	157	4	456	0
78	男	87	179	27	0	2	165	64	90	29	92	36	2	505	14	21	0	404	13	31	6.1	0	2	2	7	137	1	无	0
74	男	70	158	1	1	1	104	45	58	14	99	36	10	1967	14	20	23	444	15	34	5.8	4	5	0	2	226	16	无	0
60	女	75	161	2	1	2	117	77	85	26	99	36	10	747	12	19	5	433	13	36	16.2	4	4	0	3	63	48	257	0
38	男	49	151	28	0	12	120	81	90	20	98	37	11	978	14	25	1	3996	12	27	2.3	3	5	0	2	95	1	57	0
66	男	39	158	28	0	1	129	68	78	21	97	37	3	983	13	19	0	145	12	38	1.8	2	3	0	8	103	3	无	0
40	男	46	151	27	0	12	122	82	92	21	97	37	11	970	14	26	0	3584	12	30	6.5	3	4	0	2	79	0	24	1
37	男	73	158	28	0	9	151	77	98	10	92	36	2	684	14	14	1	439	17	15	5.8	6	1	0	2	131	0	无	0
42	女	47	153	27	0	12	126	82	89	20	98	37	11	924	15	26	0	3279	13	33	0.71	2	5	0	3	97	1	54	1
73	男	51	159	12	0	11	103	82	89	24	86	36	3	370	14	18	1	2563	17	47	27.6	1	1	0	1	314	1	无	0
71	男	66	158	0	0	1	104	43	56	13	99	36	10	1879	14	21	22	351	15	37	21.9	5	4	0	2	246	15	无	0
61	女	57	158	25	0	3	133	70	89	19	100	36	5	578	12	23	0	160	16	54	5.7	1	7	0	1	5	17	241	0
34	男	77	157	7	1	2	104	71	78	27	86	36	7	1356	14	22	1	539	17	38	10.4	3	1	0	2	61	6	75	0
50	男	48	158	29	0	11	121	72	90	19	90	37	6	1606	15	15	5	834	14	41	15.3	1	7	1	2	23	3	无	0
47	男	79	158	28	0	4	132	69	81	24	94	36	7	374	12	16	0	4256	12	28	10.9	0	2	0	3	182	41	12	0
69	男	68	150	4	1	3	106	86	90	24	89	36	3	831	14	14	1	494	16	38	8.6	1	4	0	1	24	1	无	0
74	男	69	158	2	0	2	107	43	57	13	98	36	9	1880	15	21	22	294	14	35	5	5	5	0	3	235	17	108	0
60	男	45	158	28	0	6	94	70	79	24	98	36	3	723	12	17	1	539	5	44	8.4	7	6	1	3	177	18	无	0
54	男	37	158	7	0	7	121	57	76	28	99	37	13	2423	8	27	1	1132	14	40	8.91	1	5	0	2	196	38	398	0
74	女	58	158	4	1	2	102	59	69	21	91	36	1	637	14	14	2	885	12	17	4.2	8	6	2	3	86	29	327	0
40	男	67	172	27	0	1	118	52	71	29	97	38	6	1206	7	27	1	937	12	12	7	2	6	2	3	170	2	无	0
69	男	79	176	18	1	2	128	68	87	22	92	36	1	174	14	8	3	878	12	27	6.5	2	1	0	1	137	0	453	1
67	男	57	158	29	0	7	150	102	120	15	96	37	10	626	8	24	0	938	23	41	13	0	3	0	3	70	37	68	0
55	男	67	156	27	0	2	93	74	77	20	96	36	3	392	14	23	1	393	13	26	2.7	7	5	4	2	198	2	43	0
48	男	81	158	21	1	3	100	56	71	19	97	36	4	504	12	16	6	331	12	24	1.5	3	4	0	0	246	5	无	0
46	男	49	158	4	1	4	128	70	82	21	94	37	6	1236	12	29	0	247	20	50	5	2	4	0	8	19	4	327	0
56	女	64	158	28	0	4	106	86	92	26	96	36	4	1363	13	19	1	979	10	38	4.7	4	6	3	0	41	3	105	0
76	男	81	158	26	0	0	137	58	77	20	97	36	2	318	13	13	1	37	10	19	2.3	0	5	3	2	125	7	456	0
67	男	58	158	0	1	1	98	33	55	21	99	36	11	453	14	24	7	1503	13	27	4.7	4	8	0	2	22	0	241	0
58	男	48	158	27	0	1	134	86	97	18	100	36	5	875	12	13	2	1169	13	33	2.9	0	6	2	0	5	6	无	0
62	女	64	158	26	0	0	114	85	96	17	94	36	3	491	13	20	16	8	10	29	17.2	1	5	0	3	179	3	12	0
44	男	47	158	27	0	3	133	96	104	18	99	36	3	694	14	16	4	911	9	30	11.2	8	4	3	0	12	16	12	0
80	男	96	184	27	0	3	103	53	67	0	93	36	7	114	15	22	0	932	15	37	0.7	3	1	2	0	78	1	无	1
54	男	76	158	27	0	4	142	79	90	25	97	37	6	922	13	11	0	379	11	37	15.9	0	3	0	8	39	7	241	0
45	女	78	158	29	0	3	129	66	79	23	95	36	7	657	13	16	0	3775	12	31	8	0	1	0	3	178	41	241	0
68	男	69	158	28	0	3	157	59	79	16	97	36	1	362	13	12	2	534	13	34	6.1	4	1	0	2	96	6	234	0
47	女	78	158	28	0	4	131	69	81	23	94	36	6	734	13	17	0	3860	12	26	1	0	2	0	3	193	41	无	1
52	男	77	158	28	0	5	145	76	91	24	96	37	7	776	12	10	1	0	13	32	4.2	0	3	0	8	44	5	240	0
74	男	71	158	26	0	1	107	81	86	19	94	36	2	621	13	17	2	504	16	20	17.2	2	4	2	3	48	1	无	0
72	男	78	158	29	0	2	80	56	62	15	100	36	11	1276	6	31	0	778	16	37	2.8	5	3	3	2	140	2	456	0
48	男	74	158	27	0	2	180	80	109	19	94	36	3	462	11	19	1	255	10	23	27.6	1	3	0	0	51	48	222	0
80	男	87	178	28	0	3	161	63	91	29	92	36	2	791	13	21	0	6	13	32	8.6	0	2	3	8	139	2	12	0
75	男	43	158	13	1	4	110	66	80	16	99	36	8	371	12	22	0	966	8	42	4.6	2	3	2	2	41	16	无	1
53	女	65	165	26	0	3	98	68	75	21	99	36	8	932	15	16	0	247	13	27	4.17	4	2	0	7	193	0	125	0
52	男	49	158	28	0	11	120	75	90	20	90	36	6	1316	15	15	5	98	13	40	23	1	7	1	3	15	4	453	0
52	男	74	146	28	0	1	108	90	96	28	99	35	7	626	7	27	0	320	12	31	6.2	5	0	0	2	36	22	无	0
79	男	56	153	27	0	1	92	46	60	19	99	36	5	1037	11	24	1	1631	11	29	11.2	5	0	2	9	182	3	57	0
66	男	80	162	0	0	2	117	90	85	22	86	37	16	2521	3	46	35	354	35	5	8.3	6	4	0	4	142	1	56	0
65	男	66	158	29	0	4	127	89	102	22	96	36	6	769	14	9	0	1628	15	27	15.3	7	6	2	4	206	0	222	0
35	男	89	158	0	0	0	176	154	159	24	100	36	11	204	3	39	3	6818	12	30	21.9	2	4	0	4	176	13	无	0
81	男	80	158	29	0	1	131	55	77	20	97	36	2	355	13	12	3	36	12	18	5.8	0	5	3	2	128	5	无	0
68	女	70	158	27	0	3	153	61	80	16	97	36	1	222	13	12	0	557	12	36	4.55	4	2	0	2	98	7	27	0
51	女	43	153	28	0	4	127	70	83	19	99	36	2	723	13	14	1	190	10	32	5.2	3	3	0	1	145	7	无	0
50	男	53	152	27	0	12	104	43	64	17	96	37	5	522	14	20	1	1634	12	49	2.44	7	2	1	2	69	9	无	0
40	男	53	151	28	0	11	123	82	87	21	98	37	11	946	14	26	0	3726	13	32	5.2	2	4	0	2	86	0	125	0
73	男	51	158	12	1	12	101	86	88	23	86	36	4	254	14	18	2	3077	16	48	6.2	1	2	0	1	327	0	无	0
52	男	49	158	27	0	10	121	73	84	21	90	36	6	1467	13	13	5	482	14	44	2.9	0	8	0	3	16	5	843	0
35	男	72	158	2	0	2	115	84	91	22	92	36	3	786	9	26	2	1008	14	16	3.3	7	2	2	0	14	14	43	0
53	男	79	179	19	0	7	87	60	69	20	99	36	6	1744	13	34	21	15	7	41	14.4	2	6	0	1	151	11	279	0
62	女	77	158	4	1	1	111	72	83	33	64	36	8	797	12	24	4	1422	15	40	6.5	4	1	0	0	54	2	41h	0
59	男	52	160	27	0	1	144	102	112	33	94	36	3	270	9	16	1	895	14	35	5.2	0	1	1	3	78	45	无	0
68	男	69	158	27	0	3	124	87	102	22	95	36	6	966	15	10	0	1715	16	30	8.2	7	5	3	4	196	0	无	0
44	男	78	158	27	0	3	129	63	75	23	94	36	7	538	13	17	0	4257	11	29	6.9	0	2	0	2	179	39	222	1
37	男	71	158	0	1	2	118	80	88	22	92	36	3	579	9	27	2	585	15	16	6.5	6	1	3	1	7	15	无	0
56	男	76	161	2	1	3	120	73	85	27	99	36	9	625	13	19	6	623	13	33	4.2	4	4	0	3	77	49	453	0
53	男	78	158	30	0	5	136	75	90	24	96	37	6	875	12	11	0	382	13	41	6.8	0	4	0	8	43	10	18	0
40	男	64	158	10	1	2	116	77	89	15	98	36	8	431	14	24	1	1068	18	19	3.55	0	4	3	6	171	1	无	1
63	女	60	158	27	0	2	128	71	86	18	99	36	5	569	12	23	0	422	16	55	10.2	1	7	0	1	5	16	600h	0
54	男	41	158	27	0	11	137	59	78	17	100	37	3	2035	14	19	9	94	14	40	0.8	7	6	1	9	142	0	无	0
38	男	65	158	10	1	2	120	78	86	16	99	36	7	640	15	24	1	1817	18	20	2.5	0	4	3	6	172	4	无	1
48	男	78	158	22	0	4	100	54	72	18	96	36	4	334	13	16	6	977	12	26	2.3	4	3	0	0	274	5	18	0
70	男	70	158	26	0	0	151	63	90	21	95	36	9	1883	7	24	15	364	21	24	8.91	2	4	3	6	4	1	76	0
40	男	49	153	29	0	13	125	85	87	20	98	37	11	972	15	25	1	3269	13	24	1.3	3	5	0	3	97	2	105	0
52	女	63	165	28	0	3	94	67	77	22	98	36	8	1035	14	15	0	418	13	28	5.2	4	3	0	6	200	0	无	0
41	女	115	158	28	0	8	108	53	65	15	100	36	5	1415	15	24	6	411	18	35	22.3	3	2	0	3	166	50	无	0
52	女	45	152	28	0	4	126	67	80	19	99	36	1	730	14	13	0	476	11	33	3.2	4	3	0	1	147	7	无	0
65	男	67	158	28	0	4	125	88	99	22	96	36	6	780	14	11	0	1863	16	27	12.8	7	5	3	5	204	1	无	0
55	男	48	149	28	0	3	118	67	80	20	95	36	7	1280	15	18	0	674	15	42	6.5	4	3	4	1	110	5	无	0
45	男	46	158	28	0	3	136	97	104	19	100	36	2	690	15	19	3	260	9	31	9	8	5	2	0	1	18	35	0
54	男	55	158	27	0	3	118	54	64	19	95	37	9	1782	15	14	0	358	20	23	9.8	0	4	0	3	112	5	280	0
51	女	76	158	27	0	1	178	82	103	20	95	36	2	676	11	17	0	1	10	19	2.8	2	2	0	1	79	50	无	0
21	男	61	150	28	0	4	144	65	81	19	100	36	2	255	14	11	1	252	11	26	6.2	3	4	1	0	86	7	无	0
74	男	44	158	16	1	3	108	68	75	17	99	36	8	319	12	22	0	1809	9	38	7.7	1	4	2	2	53	17	138	1
63	男	60	158	26	0	2	132	71	84	18	99	36	4	564	13	21	0	55	16	56	1.3	0	7	0	1	21	16	227	0
53	男	40	158	5	1	6	122	58	72	28	100	37	13	2439	7	28	0	876	15	37	5.3	2	6	0	3	184	43	1095	0
41	男	72	158	23	1	23	137	77	89	18	100	36	11	141	14	30	3	5012	12	27	3.71	8	2	0	0	313	14	无	0
42	男	67	153	28	0	0	111	52	65	19	98	37	5	742	13	20	9	743	17	33	12.8	1	8	1	0	198	17	无	0
33	男	57	158	2	0	1	129	56	78	14	95	36	5	213	13	21	3	4874	13	36	1.8	3	1	0	0	53	25	105	0
36	女	71	158	2	0	2	115	81	91	22	92	36	3	498	10	27	2	471	15	16	0.53	6	2	2	0	2	15	35	0
56	女	76	158	27	0	5	138	74	92	25	97	37	6	946	13	11	0	269	12	36	8.4	0	4	0	7	59	6	23	0
50	男	75	158	29	0	1	175	77	111	20	94	36	3	672	11	17	0	431	10	22	14.7	2	3	1	0	62	49	125	0
53	男	52	158	19	0	20	155	102	115	27	90	37	3	872	14	21	0	214	14	36	2.3	1	4	3	0	45	1	无	0
84	男	54	158	6	0	3	159	128	138	22	86	36	1	391	13	19	0	75	16	16	3.9	4	6	0	2	27	51	23	0
39	男	70	174	27	0	0	119	50	69	29	98	38	6	1217	7	27	1	176	13	10	5	2	7	3	2	177	0	32	0
51	男	73	158	26	0	1	176	83	108	20	95	36	3	556	11	17	0	352	11	20	2.9	1	2	1	1	73	49	无	0
40	男	71	158	22	0	23	139	75	87	20	99	36	12	233	15	31	2	5256	13	28	4.5	7	2	0	0	307	18	234	1
75	男	48	158	29	0	1	63	39	48	15	99	36	14	1226	2	47	4	726	13	28	21.3	8	2	0	3	161	9	无	0
59	男	94	158	28	0	2	67	35	43	16	93	36	7	787	14	19	2	2560	11	36	14.5	0	5	3	3	183	4	无	0
60	男	69	158	28	0	2	95	48	62	25	100	37	9	387	15	20	1	1929	15	28	2.2	4	4	1	2	120	0	无	0
69	男	83	178	16	0	1	130	70	91	21	92	36	1	61	15	9	3	893	13	29	16.2	3	2	0	1	129	0	无	1
70	女	72	158	27	0	12	130	93	105	23	95	37	11	3035	14	13	1	72	15	31	7.7	5	8	2	7	241	4	无	0
52	女	53	158	23	0	4	140	54	77	22	100	38	8	2830	15	19	0	305	13	9	4.4	7	5	3	0	187	43	26	0
58	男	72	158	27	0	5	124	71	88	31	98	36	10	45	7	24	3	25941	13	27	3.9	5	2	3	0	152	49	452	0
23	女	77	158	29	0	3	124	48	66	15	96	36	4	142	13	14	0	1583	15	32	6.1	3	6	0	3	43	2	无	1
26	男	75	158	28	0	3	129	50	64	15	95	36	5	186	12	13	0	1507	15	33	21.9	3	5	1	2	37	3	无	0
33	女	54	158	1	0	1	131	56	81	14	96	36	6	236	14	21	3	4582	13	35	4.7	3	2	0	0	59	30	78	0
88	女	53	158	28	0	2	97	80	84	19	85	36	9	474	6	35	3	649	12	31	41.1	8	1	0	2	186	25	无	0
70	男	53	158	2	1	1	101	36	52	21	99	36	12	568	13	24	7	1639	12	25	25	3	8	0	2	27	0	无	0
60	男	76	158	29	0	3	142	56	79	17	99	36	10	399	7	25	2	1189	14	31	5.3	4	0	0	2	213	6	无	1
50	男	98	166	29	0	0	119	53	68	26	95	36	4	1688	13	26	1	555	13	26	12.8	4	2	0	2	165	2	227	0
52	男	60	121	20	0	3	116	69	77	15	98	38	11	2340	15	19	3	378	23	33	14.4	2	1	1	2	21	3	无	0
39	男	73	158	1	1	2	117	80	87	22	92	36	3	842	9	29	2	152	15	20	16.2	7	2	3	0	6	13	241	0
44	男	79	158	26	0	3	131	66	84	23	95	36	6	563	12	17	0	3619	12	28	8.41	0	1	0	2	203	40	无	1
65	男	53	163	27	0	3	113	86	94	31	99	36	4	424	14	25	2	1103	16	47	1.8	0	3	0	3	221	4	无	0
55	女	64	158	2	1	0	110	53	67	0	98	36	9	444	13	28	7	1773	15	27	10.4	6	0	0	2	106	26	无	0
56	女	92	182	6	0	3	131	79	80	24	98	36	5	518	14	11	2	77	25	34	9.3	5	2	1	0	98	22	24	0
74	男	50	139	27	0	3	139	62	76	20	93	36	5	360	14	27	1	694	12	28	2.89	4	5	4	2	94	1	35	1
59	男	80	158	27	0	1	95	67	77	19	93	37	4	927	8	20	0	368	15	37	10.1	0	2	0	0	144	16	无	0
63	男	54	158	1	0	1	92	43	58	16	93	36	6	2685	12	28	14	356	14	30	5.2	2	1	0	3	129	5	无	0
64	男	66	153	3	0	2	143	80	99	19	96	36	7	481	5	27	0	1929	17	52	16.7	3	1	2	2	339	8	43	1
64	女	65	158	30	0	3	127	88	98	22	96	36	6	832	14	11	1	980	16	28	1.8	7	6	2	4	205	0	256	0
60	男	45	158	26	0	1	134	83	99	17	100	36	5	1018	11	15	3	1125	12	32	4.2	0	6	2	1	12	4	无	0
63	男	77	158	4	0	0	109	69	85	33	65	36	7	603	10	25	4	1220	16	42	3.2	5	2	0	0	58	0	125	0
71	男	56	158	29	0	7	154	109	118	14	96	37	10	389	8	24	0	985	23	45	6.8	0	2	0	3	67	39	无	1
43	男	44	158	28	0	3	134	94	103	19	99	36	2	611	14	17	2	10	9	33	14.5	7	5	3	0	21	18	无	0
61	男	80	158	27	0	2	95	68	76	20	93	37	3	974	8	17	0	100	15	33	9.6	0	2	0	0	150	13	无	0
52	女	99	158	27	0	1	101	81	85	25	91	37	3	2629	11	21	1	36	15	27	5.2	7	2	0	2	62	1	1072	0
64	男	67	158	27	0	3	127	86	102	21	95	36	6	868	14	10	0	1039	16	30	10.2	7	5	3	5	210	0	无	0
48	男	77	158	23	1	3	105	55	68	19	97	36	4	430	13	16	6	1076	12	27	41.1	4	4	0	0	253	5	143	0
52	男	69	158	25	0	2	125	58	75	11	90	35	8	428	3	32	0	647	14	22	3.55	7	5	0	2	107	1	12	0
49	女	76	158	29	0	2	176	83	110	18	94	36	3	692	12	17	1	173	11	26	0.9	1	3	0	1	64	50	87	0
42	女	56	158	26	0	2	152	104	112	18	83	36	10	340	6	39	0	1091	13	33	28	8	6	0	2	55	3	无	1
75	男	45	158	6	0	7	85	45	57	27	87	37	2	341	15	23	0	144	13	29	22.3	3	4	3	3	143	8	无	1
62	男	59	158	27	0	2	135	69	85	18	99	36	4	587	12	23	1	137	16	55	3.3	1	6	1	1	16	16	453	0
48	男	81	164	28	0	2	146	92	109	14	99	36	3	789	8	24	1	777	26	48	21.9	7	2	2	5	77	1	24	0
52	男	70	158	26	0	2	125	59	76	10	91	35	8	439	3	32	0	363	15	21	11.2	6	5	0	2	104	1	75	1
51	女	61	164	28	0	4	99	69	75	21	98	36	8	1020	14	15	0	460	13	27	2.89	4	2	0	7	209	1	无	0
70	男	57	158	29	0	8	154	108	118	15	96	37	10	421	9	23	0	1593	24	45	1	0	3	0	2	60	35	无	1
78	男	53	133	18	0	5	62	38	49	22	91	36	10	2445	14	21	0	321	12	28	4.4	2	4	2	3	182	3	227	0
80	男	46	158	0	1	0	96	50	64	19	94	36	11	1028	7	28	2	9777	12	26	0.8	3	6	0	2	489	15	无	1
42	男	51	158	27	0	1	177	79	98	18	96	37	4	628	10	13	1	362	12	44	4.2	2	3	0	3	141	11	241	0
79	男	60	150	28	0	1	92	50	59	19	99	36	5	1093	12	25	2	1821	11	29	4.5	5	1	3	10	202	3	无	0
70	女	61	158	28	0	4	110	48	73	17	90	37	8	2341	14	25	17	839	17	53	4.16	5	4	3	0	79	8	无	0
74	男	68	158	0	1	1	106	39	58	13	98	36	9	2140	15	22	21	432	15	39	15.3	4	4	0	3	246	16	无	0
74	男	52	140	28	0	3	136	64	78	21	93	36	5	242	15	27	0	508	11	27	8.4	4	6	3	3	93	5	无	0
51	男	64	165	29	0	3	100	69	73	21	98	36	9	1030	15	13	1	822	13	28	0.53	4	2	1	7	194	3	无	0
59	男	54	145	27	0	2	109	40	55	16	99	37	3	662	13	16	1	44	14	1	4.2	3	7	0	1	242	13	240	0
55	男	43	168	28	0	7	147	74	97	18	93	37	5	1416	14	13	0	154	19	36	4.65	8	4	0	1	150	1	无	0
79	男	88	179	26	0	3	162	60	93	29	91	36	2	450	14	20	1	368	14	31	4.5	0	2	2	7	117	2	无	0
58	女	50	158	7	1	1	113	18	32	24	86	36	4	77	4	27	8	1100	13	37	9.3	2	1	0	0	76	13	280	1
64	男	66	158	28	0	3	127	86	99	22	95	36	5	813	14	10	1	489	15	31	6.8	7	6	3	4	190	2	23	0
60	男	41	158	29	0	2	117	96	103	17	95	36	0	251	15	17	0	601	20	40	28	5	3	0	7	262	17	无	0
59	男	45	152	28	0	4	122	59	79	19	95	36	8	1366	14	16	0	97	15	41	4.16	4	3	3	1	89	5	24	0
40	男	60	158	9	0	2	116	76	87	15	98	36	8	390	14	24	2	1685	18	20	3.3	0	4	2	7	158	3	398	1
50	女	53	153	16	1	17	142	64	82	25	87	36	8	137	14	16	0	26112	22	47	21.9	2	4	4	3	94	18	无	1
50	女	53	153	26	0	13	104	43	61	18	96	37	6	977	15	20	2	531	13	48	6.1	7	1	1	2	71	7	无	0
83	男	55	158	7	1	3	155	127	140	22	85	37	2	609	12	18	0	88	16	17	11.2	3	5	0	3	7	48	35	0
61	男	54	158	22	1	22	134	92	101	17	100	36	12	6764	14	20	1	1294	15	39	5	6	8	0	8	64	0	无	0
62	男	73	158	1	0	2	131	87	102	23	100	36	2	134	15	15	1	827	13	32	21.9	1	2	3	7	112	0	222	1
49	男	56	158	27	0	3	121	99	104	20	94	37	6	379	14	23	1	1973	14	28	13.61	3	2	2	5	98	33	453	1
56	男	51	158	0	0	1	82	61	67	25	96	36	9	1377	14	20	2	1389	17	24	4.7	7	3	1	3	186	16	296	0
59	男	68	157	27	0	4	136	75	94	30	99	36	10	63	7	25	2	26175	14	30	8.5	5	1	2	1	174	53	无	1
76	男	82	158	27	0	0	138	54	80	19	96	36	2	542	14	12	2	189	11	14	4.5	0	5	4	3	130	4	无	0
41	男	64	152	30	0	1	111	49	66	18	99	37	5	598	12	20	10	476	17	34	4.7	2	7	2	1	201	18	257	0
78	女	54	158	27	0	2	61	33	47	15	98	36	15	988	2	47	3	488	13	31	13.61	7	3	0	3	164	7	无	1
57	男	62	160	27	0	2	99	55	69	14	99	36	12	2074	8	21	12	105	15	23	12.8	1	3	0	1	54	6	无	0
65	男	41	158	27	0	9	106	63	75	14	100	36	3	183	15	24	1	11090	17	63	3.55	4	2	2	1	26	4	12	0
48	女	50	158	5	0	4	120	68	82	21	93	37	7	1184	12	30	0	634	19	43	11.2	2	4	0	7	17	6	无	0
88	男	51	158	27	0	3	86	64	68	16	98	37	2	896	13	20	9	251	20	48	6.5	8	5	4	0	159	1	无	0
79	男	48	158	0	1	1	92	52	64	21	93	36	10	955	7	28	2	9598	11	29	3.2	4	5	0	2	478	18	600h	1
42	男	50	158	29	0	1	179	81	93	18	95	37	5	492	9	12	0	269	12	44	3.71	2	2	0	2	149	10	无	0
53	男	54	158	25	1	4	141	56	78	21	98	38	8	2712	14	18	2	8	13	10	8.2	7	5	4	0	197	44	无	0
56	女	46	150	27	0	4	121	65	79	20	94	36	7	1219	14	19	0	352	14	44	14.7	5	3	3	1	86	6	无	0
64	女	51	158	26	0	1	102	68	82	22	96	36	10	3491	15	24	6	149	15	26	4.4	0	2	0	7	125	1	35	0
53	男	63	158	28	0	3	101	18	39	26	99	36	7	812	8	35	1	118	11	36	2.89	3	1	1	0	196	52	无	0
78	男	54	151	27	0	4	115	69	83	14	96	37	12	1808	9	32	1	245	16	49	2.6	3	3	0	1	111	3	23	0
46	男	81	164	28	0	0	145	95	109	14	100	36	3	1145	9	22	1	424	27	42	11.9	8	3	1	4	88	1	240	0
45	男	82	164	26	0	1	142	91	108	13	100	36	4	1007	8	22	1	208	27	43	41.1	7	3	2	5	80	0	57	0
41	男	54	158	28	0	2	178	80	99	18	95	36	4	669	10	12	0	153	11	41	8.3	2	2	0	2	159	6	无	0
58	女	90	183	4	1	3	130	78	79	24	96	36	5	504	14	12	1	763	25	28	6.5	5	2	0	0	110	25	143	0
64	男	65	158	28	0	0	117	83	95	17	94	36	3	816	13	20	15	327	11	29	8.2	1	6	0	2	173	2	无	0
76	女	82	158	28	0	9	98	55	66	14	98	38	7	192	7	20	13	687	13	34	16。3	4	4	3	3	56	13	26	1
63	男	58	158	27	0	1	132	69	88	19	100	36	5	641	13	22	0	446	16	54	8.5	0	7	1	1	10	17	无	0
65	男	39	158	27	0	1	128	69	77	22	97	36	4	746	14	20	1	126	13	35	5	1	3	0	9	91	1	无	0
58	男	71	159	28	0	5	125	71	91	30	99	36	9	24	8	24	1	25281	14	30	2.5	5	1	3	1	146	47	12	1
59	女	45	158	28	0	6	92	69	78	23	99	36	2	921	13	18	1	340	5	45	16.7	6	5	0	3	183	19	无	0
49	女	54	151	28	0	13	109	45	63	17	95	37	5	707	14	19	3	1043	13	48	1	7	2	1	2	75	8	无	0
64	女	54	158	5	1	3	96	54	67	20	85	36	10	8311	14	33	9	298	11	27	3.2	0	2	3	2	45	0	无	0
43	男	71	158	26	0	5	133	74	89	23	99	36	6	288	10	22	1	21	16	46	10.7	2	2	0	3	306	2	32	0
45	男	62	158	29	0	2	142	62	83	13	96	37	3	515	14	11	2	149	15	29	14	0	4	3	0	116	1	无	0
63	女	65	152	4	0	3	143	77	97	18	97	36	6	289	5	27	0	1239	17	52	10.7	4	1	2	2	334	6	无	1
69	男	70	158	27	0	13	124	94	102	23	95	37	10	3222	15	14	1	384	14	27	31.9	5	8	2	7	219	5	无	0
50	男	78	158	20	0	3	103	61	68	18	97	36	5	521	13	15	5	587	12	27	14.5	4	4	0	1	259	5	23	0
70	男	68	158	27	0	4	145	115	123	15	95	36	4	865	15	29	1	1062	12	33	8.2	7	4	1	3	160	0	无	0
75	女	49	158	4	0	3	127	104	114	25	91	37	7	1034	15	18	2	106	8	35	6.2	4	1	0	0	129	16	无	0
64	女	66	158	27	0	4	125	90	102	21	95	36	6	830	15	10	1	821	15	28	25	6	6	2	4	197	1	无	0
47	男	68	158	29	0	1	165	77	98	26	99	36	8	928	8	25	0	1253	16	30	7.3	8	8	0	1	113	1	无	0
71	男	74	158	26	0	2	80	54	62	15	100	36	11	1313	6	29	1	168	16	38	16.2	5	3	3	3	136	2	41h	0
75	女	82	158	27	0	1	131	52	77	19	96	36	3	485	13	13	2	395	11	17	1.5	0	4	3	2	137	7	12	0
49	男	52	155	15	0	17	140	67	82	24	86	36	8	96	15	16	0	25866	22	48	2.8	2	4	4	3	80	18	98	0
76	男	51	136	19	0	6	55	45	49	22	91	36	9	2524	15	21	1	18	13	26	1	1	5	2	3	191	0	无	0
60	女	50	158	28	0	1	134	82	95	17	100	36	5	897	11	14	2	352	13	34	4.7	0	6	3	1	0	5	276	0
70	男	84	158	9	0	9	137	61	84	23	99	37	8	1286	15	20	4	237	14	25	11.3	2	1	3	9	87	0	无	0
46	男	77	158	25	0	4	130	66	79	23	94	36	7	517	12	16	0	5011	12	27	1.8	0	2	0	3	179	44	68	0
37	男	68	174	28	0	1	117	50	73	30	98	38	6	1321	7	27	2	274	12	13	1.5	1	7	3	3	183	2	无	0
56	女	43	158	28	0	11	137	60	74	18	100	37	4	2230	15	19	9	622	13	43	0.8	8	7	0	10	122	2	23	0
63	女	50	158	28	0	0	104	67	81	21	96	36	10	3477	15	26	5	1354	15	29	2.7	1	2	1	8	126	2	无	0
54	女	46	158	1	1	0	90	58	70	29	91	36	2	113	14	17	6	9675	23	44	6.5	4	1	0	0	272	32	无	0
67	男	39	158	26	0	9	104	61	75	14	99	36	3	532	15	23	1	10877	17	63	14.4	3	1	3	0	19	6	452	0
47	女	83	164	28	0	1	147	92	108	14	100	36	3	969	9	22	1	162	26	46	12.8	7	3	2	4	82	3	124	0
66	女	67	158	29	0	4	155	62	81	16	97	36	2	344	13	12	1	525	13	36	0.71	4	1	0	2	105	2	68	0
64	男	54	158	0	0	0	88	45	57	17	92	37	6	2711	13	29	14	22	15	29	0.9	3	2	0	2	118	7	35	0
94	女	64	134	28	0	0	143	102	111	24	96	36	2	387	13	17	1	211	23	39	14	7	7	0	0	51	4	无	0
49	男	80	158	27	0	7	120	59	80	15	100	36	7	318	10	24	0	1474	14	35	10.7	3	3	4	3	252	29	无	0
72	男	62	158	27	0	5	108	53	72	18	90	37	7	2271	15	24	18	156	16	52	4.5	5	3	2	0	61	11	54	0
62	男	56	145	28	0	2	108	42	58	17	100	37	3	491	14	15	1	773	12	2	2.3	3	7	0	1	237	13	6	0
52	男	79	182	20	0	7	85	61	68	22	98	36	6	1858	13	35	22	576	8	40	5.5	2	5	0	0	183	14	56	0
52	男	47	158	27	0	11	119	72	89	19	90	36	5	1538	14	14	4	86	13	45	31.2	1	7	1	2	11	5	无	0
47	男	82	165	28	0	1	145	90	110	14	99	36	3	962	9	23	2	564	26	46	12.8	8	3	2	5	90	1	6	0
69	男	51	158	26	0	13	98	49	62	27	98	37	6	697	14	20	2	57	13	43	11.3	4	6	0	0	81	11	296	1
58	女	61	163	1	0	2	142	128	135	21	91	35	12	340	12	27	0	4993	12	32	7.3	0	1	0	0	109	0	无	0
70	男	57	158	28	0	3	87	48	63	27	100	37	5	133	14	17	8	625	16	37	10.4	5	0	2	2	61	1	无	0
73	男	71	156	26	0	1	108	79	92	18	93	36	3	500	13	18	3	177	16	23	5.3	2	3	2	3	62	1	无	0
66	男	68	149	4	0	3	102	84	89	24	90	36	4	708	14	13	1	17	17	39	4.5	1	5	0	1	20	0	229	0
79	女	52	146	28	0	2	168	68	85	27	100	36	3	473	13	25	0	57	14	46	8.09	4	7	3	3	92	8	无	0
35	男	71	158	0	1	1	115	85	89	22	91	36	4	585	9	27	2	1038	14	18	6.2	6	1	2	1	1	16	无	0
48	男	81	158	7	0	3	121	64	85	11	99	36	6	1067	15	17	9	917	14	83	2.3	7	2	0	3	20	4	无	0
64	女	55	158	2	0	0	88	47	56	17	92	37	6	2816	13	29	14	242	14	31	4.58	2	1	0	3	127	4	456	0
53	男	50	158	27	0	11	118	76	86	20	90	37	5	1448	15	13	4	542	14	42	14	0	7	1	3	10	3	无	0
68	男	49	152	3	0	3	96	40	64	20	99	37	7	609	15	22	0	114	18	42	7.3	5	5	3	1	164	0	无	1
56	男	63	155	28	0	2	93	75	78	20	97	36	2	237	15	23	0	931	13	26	15.3	6	5	3	2	193	4	257	0
59	女	68	158	28	0	2	97	49	62	25	99	37	9	427	15	21	1	1874	15	31	12.8	4	5	1	2	104	1	86	0
45	男	46	158	27	0	3	132	95	101	19	100	36	2	781	14	17	3	303	10	31	2.8	7	5	3	1	25	19	无	0
56	女	72	168	27	0	9	125	87	94	21	93	36	4	867	13	20	2	1001	15	31	15.1	2	7	1	7	176	4	18	0
58	男	64	158	21	0	4	121	70	83	20	96	36	6	969	12	21	3	1392	12	44	0.7	3	3	1	3	125	11	241	0
77	女	82	158	29	0	1	134	55	77	20	96	36	2	109	14	13	1	158	11	17	9	0	4	3	3	142	3	无	0
41	女	54	158	28	0	0	177	79	98	19	94	37	4	538	9	14	0	327	12	40	4.2	1	3	0	2	149	10	无	0
15	女	55	151	16	0	15	99	68	77	21	96	37	7	548	14	20	0	1439	14	34	3.71	0	1	0	0	268	9	327	0
58	男	67	157	27	0	2	94	74	79	19	97	36	2	245	14	24	0	150	13	25	28	6	5	4	3	186	2	无	0
75	女	52	158	3	0	3	131	107	113	25	91	37	7	1187	15	18	1	1234	7	35	5.5	3	2	0	0	118	22	无	0
70	男	67	158	28	0	4	141	112	122	14	95	36	5	1009	15	27	1	203	13	31	9.3	7	3	1	3	143	0	238	0
73	男	83	158	28	0	1	132	52	78	20	98	36	3	313	13	15	2	190	11	15	5.8	0	4	4	2	127	3	23	0
41	男	58	158	24	0	5	176	85	106	22	99	37	4	706	6	31	1	23	20	43	6.9	6	0	0	1	40	1	32	0
80	女	87	179	28	0	2	161	60	88	29	92	36	2	462	14	20	1	520	14	33	4.6	0	1	2	8	140	3	无	0
48	女	47	158	26	0	2	111	80	87	20	91	36	5	737	14	13	1	346	14	37	11.24	8	1	3	0	299	2	105	0
42	女	72	158	24	1	23	135	75	88	18	100	36	11	104	14	31	2	5168	13	31	11.2	8	2	0	0	314	14	无	1
65	男	40	158	27	0	1	125	64	79	21	97	36	3	786	13	18	0	495	13	36	9	1	3	1	8	99	3	105	0
45	男	81	158	27	0	7	116	60	76	16	99	36	6	257	9	24	1	1011	14	39	13.7	4	3	5	2	248	26	85	0
48	女	62	158	14	0	8	117	60	71	22	96	36	5	447	15	16	4	346	13	27	26.4	1	5	0	3	107	1	1072	1
57	男	66	154	29	0	2	92	72	78	19	97	36	2	382	14	23	0	367	14	26	1.5	6	4	3	2	187	1	无	0
48	男	45	158	31	0	2	115	78	83	20	92	36	4	337	14	13	0	1085	14	34	4.2	7	2	3	0	295	0	56	0
72	男	53	158	28	0	3	92	48	62	27	98	36	4	333	14	15	8	1089	16	37	11.9	5	1	3	3	62	2	296	1
79	男	82	158	0	0	1	65	49	53	26	96	37	15	2057	13	35	0	404	15	40	5.2	0	2	4	1	86	5	240	0
44	男	80	158	28	0	4	131	66	83	23	96	36	6	473	13	16	0	4069	11	28	4.2	0	1	0	2	214	39	无	1
75	男	71	158	28	0	1	112	80	89	18	93	36	2	413	13	17	3	412	16	23	3.3	1	4	3	2	53	0	234	0
60	男	61	164	2	0	1	138	129	135	20	92	35	12	364	12	26	0	6393	11	31	3.3	1	1	1	1	106	1	无	0
55	男	66	157	29	0	2	95	71	75	20	97	36	2	266	14	24	0	352	13	24	16.7	7	4	3	3	202	4	279	0
66	女	55	164	28	0	4	111	85	97	31	100	36	3	341	15	26	2	1400	16	48	9.8	0	3	0	2	209	2	456	0
67	男	51	153	4	0	3	95	42	57	20	99	37	6	303	14	22	1	9	19	43	1.3	4	5	3	1	167	0	无	1
70	男	58	158	28	0	6	149	105	117	14	94	37	10	321	9	24	0	1317	22	41	2.8	0	3	0	2	65	37	无	0
47	男	58	158	28	0	4	125	91	102	28	93	37	6	1299	15	27	1	889	11	49	16.7	3	2	0	1	44	0	无	0
76	男	50	156	13	1	12	100	81	90	23	85	37	3	258	13	18	2	2289	16	52	14	2	2	0	2	317	0	27	0
52	女	74	158	27	0	1	177	85	107	19	95	36	2	746	11	18	1	170	10	17	1	2	2	0	1	74	45	无	0
41	女	114	158	27	0	9	109	50	66	14	99	36	4	1324	14	23	7	127	17	39	6.5	4	2	0	2	169	51	23	0
40	男	62	158	9	0	3	113	77	85	16	98	36	7	338	15	24	1	1187	19	24	21.3	0	4	2	6	183	3	1095	0
54	男	78	179	21	0	8	86	62	69	21	99	36	6	1896	14	33	21	62	8	42	5.2	3	5	0	1	158	12	无	0
61	女	48	158	28	0	1	134	83	97	17	100	36	5	893	12	13	3	511	13	33	10.4	0	7	3	0	1	2	无	0
41	女	73	158	23	0	22	138	78	86	19	99	36	11	124	14	32	2	5048	12	29	0.8	7	1	0	0	316	17	241	1
65	男	39	158	29	0	1	129	64	79	22	98	37	4	859	14	20	0	413	12	38	9.47	1	3	0	8	106	1	无	0
49	男	77	158	27	0	2	140	86	98	17	97	36	9	405	15	16	1	1152	37	180	4.2	3	1	0	2	174	3	无	1
49	男	67	158	28	0	3	126	61	77	10	90	34	7	491	3	33	0	844	14	21	9	6	5	0	2	109	6	无	0
55	女	48	158	0	1	0	80	58	68	24	96	36	8	1436	13	19	1	650	16	26	4.7	8	4	0	3	196	16	35	0
65	男	73	158	27	0	3	136	72	89	13	95	37	8	2019	6	18	0	497	5	57	4.16	1	5	1	1	135	3	108	0
53	女	41	167	28	0	7	152	79	97	18	93	37	5	1205	15	14	0	419	19	36	3.3	8	5	0	1	148	3	无	0
74	男	78	160	28	0	3	143	122	125	18	97	37	6	1025	14	24	5	424	13	53	15.3	8	4	0	2	131	16	无	0
20	男	57	152	16	0	14	98	72	79	21	95	37	7	891	14	19	0	2539	14	34	14	0	1	0	1	270	7	无	0
70	男	56	158	27	0	12	137	120	123	17	97	36	3	409	13	19	1	720	15	24	14.4	7	7	2	1	57	4	238	0
50	男	77	158	26	0	2	144	89	100	17	97	36	8	587	15	16	1	1474	37	183	2.9	4	1	0	2	154	4	无	1
53	男	99	158	27	0	1	98	82	88	26	92	37	3	2797	11	21	2	428	16	26	9	6	3	0	3	59	3	31	0
56	男	80	158	28	0	2	95	68	73	19	94	37	4	967	8	20	0	323	16	36	9.47	0	2	0	0	144	18	无	0
72	男	68	158	1	0	0	103	43	58	13	98	36	9	1998	14	21	22	417	15	37	26	4	4	0	3	246	14	296	0
55	女	64	158	2	1	0	112	51	66	0	97	36	9	437	14	28	7	2161	16	26	4.5	5	0	0	2	112	29	6	1
35	男	71	158	28	0	9	157	79	98	10	93	36	2	586	13	14	0	212	17	17	15.3	7	0	0	2	129	1	32	0
65	男	69	158	28	0	4	152	57	83	16	97	36	1	409	13	13	2	288	12	34	4.2	3	1	0	2	82	7	无	0
58	女	69	156	27	0	6	128	71	88	30	98	36	9	236	7	24	2	25737	13	26	6.5	6	2	2	0	160	51	85	0
43	女	46	158	28	0	3	133	96	101	18	100	36	2	623	14	18	2	186	9	30	6.9	8	4	3	1	12	17	无	0
58	女	64	158	21	0	4	121	70	83	20	96	36	6	969	12	21	3	1392	12	42	1.5	3	3	1	3	125	11	无	0
68	女	70	158	28	0	3	157	65	82	16	97	36	2	489	14	14	1	792	13	34	0.7	3	1	0	2	86	5	无	0
74	男	53	158	27	0	2	58	38	46	15	97	36	14	1067	2	47	4	805	12	28	4.58	8	2	0	3	158	7	57	1
33	男	71	158	25	0	3	89	33	49	24	100	35	9	1117	14	23	0	251	12	25	2.8	0	3	0	1	44	0	648	0
81	女	54	158	8	0	4	160	129	139	23	85	37	2	548	13	18	0	193	16	15	7.3	4	5	0	2	0	48	456	0
46	男	79	166	27	0	1	149	92	106	13	101	36	4	905	8	23	1	305	26	46	2.6	8	3	2	5	81	0	241	0
79	男	54	133	18	0	6	58	39	48	21	91	36	10	2226	15	21	0	470	13	31	6.5	1	5	3	2	174	0	无	0
70	女	68	158	28	0	0	152	63	90	20	94	36	9	1794	6	24	15	378	20	25	10.1	2	5	3	7	24	0	138	0
56	男	42	158	27	0	11	133	57	77	18	99	37	3	2176	14	20	9	33	14	42	13	7	6	0	9	133	3	41h	0
33	男	56	158	3	0	1	130	52	74	14	97	36	5	122	14	21	3	4902	13	38	5.2	4	2	0	1	71	32	32	0
79	男	80	158	1	1	1	71	48	56	27	96	37	14	1932	12	33	0	443	14	36	3.2	0	1	3	0	84	4	无	0
64	男	39	158	28	0	1	132	66	80	22	98	36	4	787	14	19	0	189	13	38	9	2	4	1	8	90	2	276	0
37	男	63	158	8	1	2	113	74	86	16	98	36	7	625	15	25	0	1655	18	19	3.55	0	5	2	7	174	2	600h	1
64	男	65	158	29	0	3	126	88	102	21	95	36	6	923	14	12	0	320	15	30	3.55	6	5	3	4	194	0	43	0
61	女	68	158	2	0	2	135	92	106	23	99	36	2	256	14	16	0	808	14	37	0.7	1	1	3	7	106	0	无	1
76	男	70	158	27	0	1	107	81	91	18	92	36	3	536	13	17	2	274	15	23	41.1	1	3	2	2	51	0	35	0
39	男	63	158	10	0	1	117	77	87	15	98	36	7	489	14	24	1	1869	18	17	2.8	0	5	2	6	171	1	241	0
80	女	58	152	26	0	1	92	49	59	18	99	36	4	935	11	24	0	1107	11	28	4.65	5	1	3	10	207	5	无	0
63	女	77	158	4	1	0	109	70	82	33	64	36	8	882	12	24	3	1531	16	41	4.16	5	2	0	0	67	1	无	0
47	女	77	158	26	0	1	140	88	98	16	98	36	8	287	15	16	1	2212	38	180	4.3	3	2	0	3	170	5	无	1
39	女	51	152	26	0	11	122	80	87	21	98	37	11	976	15	26	0	4093	13	28	8	2	5	0	2	93	0	241	0
49	男	51	155	15	0	16	141	67	81	25	86	36	9	128	14	15	0	25774	22	49	8.91	2	4	3	3	92	19	无	0
48	男	80	158	29	0	6	118	64	76	15	99	36	7	247	9	24	0	865	13	33	14	3	3	4	3	246	27	无	1
64	男	68	158	27	0	3	126	86	99	21	95	36	5	897	14	11	0	1530	16	27	8.91	6	5	3	4	199	0	62	0
33	男	70	158	29	0	4	84	39	43	24	99	35	9	1234	13	25	1	314	12	25	4.65	0	4	0	1	55	0	105	0
89	男	50	158	27	0	2	99	78	85	21	85	36	10	645	6	35	4	568	12	30	1.08	8	1	0	3	192	24	无	1
70	男	49	141	26	0	2	140	63	78	20	92	36	5	338	15	27	0	1171	12	27	17.99	4	6	4	3	107	3	无	0
37	女	49	150	26	0	12	124	80	89	20	97	37	10	789	14	27	0	3930	13	27	2.2	3	4	0	3	87	0	31	0
95	男	64	134	29	0	1	142	106	111	25	96	36	1	331	14	18	0	636	23	43	0.71	7	7	0	1	64	2	648	0
44	男	114	158	27	0	8	106	46	70	14	99	36	5	1310	15	23	7	512	17	36	2.8	4	2	0	2	164	48	无	0
49	男	47	151	27	0	3	125	66	85	18	100	36	2	743	14	13	0	6	10	32	1	4	2	0	1	152	5	421	0
42	男	48	158	28	0	2	175	77	96	18	96	37	4	562	10	13	0	15	12	43	4.2	2	2	0	3	146	9	无	0
70	男	52	158	28	0	14	135	123	126	17	97	36	3	156	12	17	1	957	16	24	12	6	7	3	1	51	0	276	1
58	女	48	158	1	0	0	90	58	67	29	92	36	1	121	15	17	7	9150	23	43	16.98	3	2	0	1	283	29	无	0
49	男	46	158	29	0	1	116	83	84	20	91	36	4	819	14	12	0	359	14	37	4.6	8	2	2	1	295	1	无	0
53	男	77	179	20	0	8	89	58	67	22	98	36	6	1880	13	34	21	659	8	43	10.2	3	6	0	0	160	11	无	0
45	男	80	158	26	0	3	130	70	81	22	95	36	6	632	13	16	0	4439	11	30	16.2	0	1	0	3	178	40	无	0
55	女	73	166	27	0	10	121	85	96	22	93	36	4	839	13	21	2	846	15	32	13.7	2	6	0	7	180	2	105	0
59	男	54	156	28	0	0	142	101	114	32	96	36	3	350	10	17	1	616	15	35	6.2	1	1	1	3	61	44	843	1
60	男	80	158	27	0	4	142	60	81	16	98	36	11	617	6	26	0	794	14	36	3.9	5	0	0	2	189	4	452	0
48	男	74	158	27	0	2	178	83	111	19	95	36	2	664	11	18	0	196	10	22	1	1	2	0	0	70	48	无	0
71	男	80	158	28	0	2	73	52	61	15	100	36	11	1181	6	31	1	136	15	36	4.55	6	2	4	3	126	5	无	0
55	女	91	179	27	0	2	90	56	66	36	91	36	1	945	14	16	2	303	30	35	4.16	7	4	2	0	90	16	无	0
53	女	98	164	28	0	1	116	52	68	26	95	36	5	1736	13	28	2	58	14	30	0.8	4	2	0	3	162	4	无	0
77	男	82	158	27	0	0	134	54	77	20	97	36	2	423	14	13	2	225	11	19	2.7	0	4	4	2	127	4	43	0
63	女	56	158	1	0	0	85	43	58	17	91	37	5	2597	13	30	14	224	14	27	21.9	2	1	0	2	122	5	无	0
59	女	68	157	27	0	2	94	72	81	19	96	36	3	369	14	23	0	645	13	25	14.5	6	5	4	3	192	4	18	0
65	男	66	158	28	0	4	127	88	100	21	94	36	5	840	15	10	0	1499	16	32	10.1	6	5	3	5	211	2	105	0
52	女	77	179	21	1	8	88	64	71	19	98	36	5	1915	13	34	21	402	7	42	10.7	2	6	0	0	161	11	无	0
78	男	46	158	4	1	5	86	48	57	26	87	37	3	261	15	23	0	44	14	27	11.2	3	4	2	2	141	9	105	1
75	男	55	158	4	0	2	106	61	68	21	92	36	2	574	15	15	2	686	12	18	4.2	8	7	2	3	91	31	无	0
58	男	48	158	26	0	6	92	73	76	24	98	36	2	729	12	19	0	29	5	44	4.5	7	5	0	3	192	15	无	0
80	女	60	151	27	0	1	89	46	58	19	99	36	5	1016	11	24	0	1242	11	28	14.5	6	1	2	10	199	3	843	0
74	男	81	158	27	0	1	132	56	76	19	97	36	2	397	13	13	2	153	11	20	4.6	0	5	4	3	139	6	无	0
59	女	55	158	20	1	21	136	88	100	18	100	36	11	6711	14	21	3	1105	15	36	12	7	8	0	7	60	0	无	0
